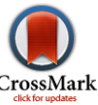

# Therapeutic Effect of Vagus Nerve Stimulation on Depressive-Like Behavior, Hyperglycemia and Insulin Receptor Expression in Zucker Fatty Rats

Shaoyuan Li<sup>1,2,3</sup>, Xu Zhai<sup>1,3</sup>, Peijing Rong<sup>1\*</sup>, Michael F. McCabe<sup>3</sup>, Xing Wang<sup>2</sup>, Jingjun Zhao<sup>1</sup>, Hui Ben<sup>1</sup>, Shuxing Wang<sup>1,2,3,4,5\*</sup>

**1** Department of Physiology, Institute of Acupuncture and Moxibustion, China Academy of Chinese Medical Sciences, Beijing, China, **2** Department of Anatomy, Xinxiang Medical University, Xinxiang, Henan, China, **3** Department of Anesthesia, Critical Care, and Pain Medicine, Massachusetts General Hospital, Harvard Medical School, Boston, MA, United States of America, **4** Primate Research Center, Guangdong Entomological Institute, Guangzhou, Guangdong, China, **5** Guangdong Landau Biotechnology Co. Ltd, Guangzhou, Guangdong, China

## Abstract

Depression and type 2 diabetes (T2D) are common comorbid diseases and highly prevalent in the clinical setting with an unclarified mechanism. Zucker diabetic fatty (ZDF, fa/fa) rats natively develop T2D with hyperglycemia and hyperinsulinemia. Here we studied whether ZDF rats also innately develop depression, what a correlation is between depression and T2D, whether insulin receptor (IR) expression is involved in, and whether transcutaneous auricular vagus nerve stimulation (taVNS) would be beneficial in amelioration of the comorbidity. Six week old male ZDF and Zucker lean (ZL, fa/+) littermates were randomly divided into naïve (ZDF, n = 6; ZL, n = 7) and taVNS (ZDF-taVNS, n = 8; ZL-taVNS, n = 6) groups. Once daily 30 min-taVNS sessions were administered under anesthesia for 34 consecutive days in taVNS groups. Blood glucose levels were tested weekly, and plasma glycosylated hemoglobin (HbA1c) level and immobility time in forced swimming test were determined on day 35 in all groups. The expression of insulin receptor (IR) in various tissues was also detected by immunostaining and Western blot. We found that naïve ZDF rats developed hyperglycemia steadily. These ZDF rats showed a strong positive correlation between longer immobility time and higher plasma HbA1c level. Long term taVNS treatment simultaneously prevented the development of depression-like behavior and progression of hyperglycemia in ZDF rats. The expression of IR in various tissues of naïve ZDF rats is lower than in naïve ZL and long-term taVNS treated ZDF rats. Collectively, our results indicate that in ZDF rats, i) depression and T2D develop simultaneously, ii) immobility time and HbA1c concentrations are highly and positively correlated, iii) a low expression of IR may be involved in the comorbidity of depression and T2D, and iv) taVNS is antidiabetic and antidepressive possibly through IR expression upregulation.

**Citation:** Li S, Zhai X, Rong P, McCabe MF, Wang X, et al. (2014) Therapeutic Effect of Vagus Nerve Stimulation on Depressive-Like Behavior, Hyperglycemia and Insulin Receptor Expression in Zucker Fatty Rats. PLoS ONE 9(11): e112066. doi:10.1371/journal.pone.0112066

**Editor:** David A. Slattery, University of Regensburg, Germany

**Received:** May 27, 2014; **Accepted:** October 11, 2014; **Published:** November 3, 2014

**Copyright:** © 2014 Li et al. This is an open-access article distributed under the terms of the Creative Commons Attribution License, which permits unrestricted use, distribution, and reproduction in any medium, provided the original author and source are credited.

**Data Availability:** The authors confirm that all data underlying the findings are fully available without restriction. All relevant data are within the paper.

**Funding:** This work was supported by National Natural Science Foundation of China, 81271243; National Basic Research Program of China (973 Program), 2012CB518503; and Project Supported National Science and Technology Ministry, 2012BAF14B10. The funders had no role in study design, data collection and analysis, decision to publish, or preparation of the manuscript.

**Competing Interests:** The authors have declared that no competing interests exist.

\* Email: rongpj@hotmail.com (PR); 13718103762@139.com (SW)

These authors contributed equally to this work.

## Introduction

Type 2 diabetes (T2D) is a metabolic disorder characterized by high blood sugar level in the context of insulin resistance, in which body cells have lost the ability to respond adequately to relatively normal levels of insulin [1]. Rates of T2D have been increasing markedly since 1960 in parallel with obesity. To make things worse, ongoing epidemiological studies estimate that greater than 60% of adult US population may be categorized as either overweight or obese, which is a major risk factor of T2D [2,3]. Furthermore, there is a growing appreciation that the complications of obesity extend to the central nervous system (CNS) and may result in increased risk for neurological comorbidities such as depressive illness. Depression is a state of low mood that affects thoughts, behavior, feelings and sense of well-being. Patients with

depression may lose interest of life and contemplate, attempt, or commit suicide [4].

During the past two decades, studies found an increased prevalence of depression in the diabetic population, and vice versa [4,5]. Despite the high prevalence of and common comorbidity between depression and T2D [6,7], the mechanism behind the phenomena is unclear. The increasing burden of T2D and major depressive disorder makes the search for an extended understanding of etiology and for the development of additional treatments highly significant.

As a kind of complementary and alternative medicine, acupuncture is generally accepted as a beneficial, well-tolerated, and safe monotherapy for depression in animal models, clinical patients, and eldercare facility residents [8–11]. Specifically, the taVNS, which stimulates the afferent auricular branches of vagus

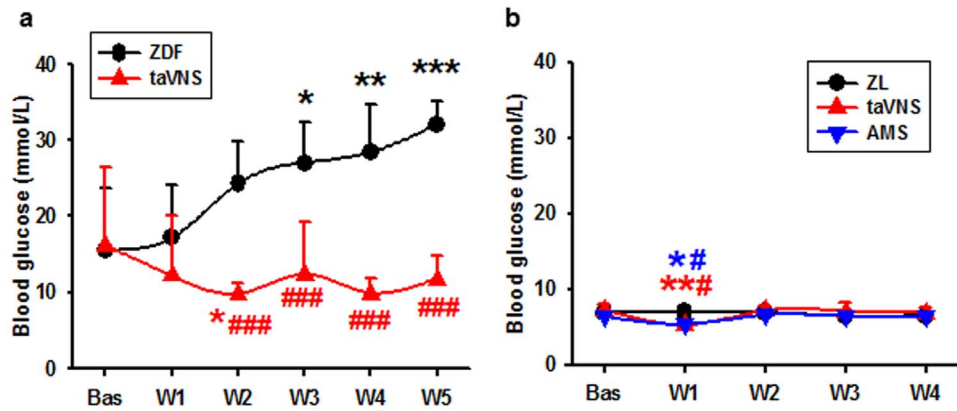

**Figure 1. Blood glucose change in naïve and taVNS treated rats.** Showing the development of hyperglycemia in ZDF rats with or without the taVNS treatment (a) and the effect of taVNS in ZL rats. ZDF, naïve ZDF rats; ZL, naïve ZL rats; taVNS, transcutaneous auricular vagus nerve stimulation; AMS, auricular margin stimulation; Bas, baseline; W1-5, week 1 to week 5 of the experiment. \*, \*\*, \*\*\*,  $P < 0.05, 0.01, 0.001$  vs. Bas; #, ###,  $P < 0.05, 0.001$  vs. naïve rats, respectively. doi:10.1371/journal.pone.0112066.g001

nerve that project to solitary nucleus [12]. Neurons in solitary nucleus further project, mono- or multi-synaptically, to the limbic and the autonomic nervous system structures, including the pineal gland, ventral tegmental area, the hypothalamus, amygdala, anterior cingulate cortex, nucleus accumbens, and the lateral prefrontal cortex [12]. Fibers from the solitary nucleus also project to the locus ceruleus and dorsal raphe nucleus, respectively major nuclei related to noradrenergic and serotonergic innervations of the entire brain cortex. It is clear that the serotonergic, dopaminergic, and noradrenergic systems are commonly involved in the pathophysiology of depression and in the neuromechanisms of action of antidepressants [12]. Acupuncture has also been shown to decrease blood glucose level in T2D [13] and is beneficial in the treatment of obesity [14,15], which is a primary cause of T2D in genetically predisposed people [3].

Based on the existence of overt depression in Zucker diabetic fatty (ZDF, fa/fa) rats [12] as well as the increasingly prevalent and high comorbidity of obesity and depression [16], in this study we used ZDF rats as a diabetes and depression rodent model to explore the correlation of the illnesses, the antidiabetic and antidepressive effectiveness of taVNS, and focused on a possible involvement of IR expression in the mechanism of the comorbidity between T2D and depression.

## Materials and Methods

### Animal model

Male ZDF rats ( $n = 14$ ) and ZL littermates ( $n = 13$ ) were purchased from Vital River Laboratories International Inc. (Beijing, China). Littermates from the same or foster mother were housed in one large cage with water and normal food pellets available ad libitum except during taVNS session. Animal room was maintained at  $22 \pm 1^\circ\text{C}$  and artificially illuminated from 7:00 A.M. to 7:00 P.M. There was no previous handling of the rats. Rats entered the experimental procedure at 6 weeks of age and were separated into ZDF and ZL groups according to the genotype, the appearance, and the first tested glucose concentration. The initial body weight was  $175 \pm 15$  grams for ZDF and  $130 \pm 10$  for ZL rats. The rats were raised in groups of three to four. The cages and beddings were changed every other day. The person in charge of the animal's welfare was also the same person who carried out the experiments. The experimental protocol was approved by Institutional Animal Care and Use Committee in China Academy of Chinese Medical Sciences.

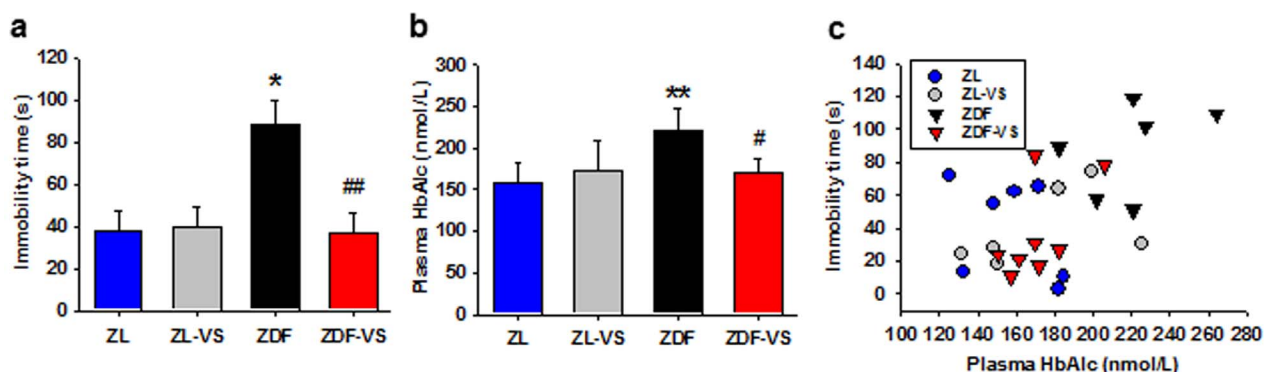

**Figure 2. Correlation of depressive behavior and glucose metabolism dysfunction.** Showing the immobility time of rats in FST (a) and the HbA1c concentration (b) on day 35 and their correlation in linear regression. ZL, naïve ZL rats; ZL-VS, taVNS in ZL rats; ZDF, naïve ZDF rats; ZDF-VS, taVNS in naïve ZDF rats. \*, \*\*,  $P < 0.05, 0.01$  vs. ZL; #, ##,  $P < 0.05, 0.01$  vs. ZDF, respectively. doi:10.1371/journal.pone.0112066.g002

**Table 1.** Immobility time in FST on day 35.

| Rat group                                                    | Naïve ZDF | ZDF-taVNS | Naïve ZL | ZL-taVNS |
|--------------------------------------------------------------|-----------|-----------|----------|----------|
| Mean                                                         | 87.833    | 36.625    | 40       | 39.667   |
| Standard deviation (SD)                                      | 28.032    | 28.096    | 29.878   | 23.304   |
| Sample size (N)                                              | 6         | 8         | 7        | 6        |
| Std. error of mean(SEM)                                      | 11.444    | 9.934     | 11.292   | 9.514    |
| Lower 95% conf. limit                                        | 58.411    | 13.312    | 12.367   | 15.207   |
| Upper 95% conf. limit                                        | 117.26    | 60.118    | 67.633   | 64.126   |
| Tukey-Kramer multiple comparisons test P value vs. Naïve ZDF |           | <0.01     | <0.05    | <0.05    |

doi:10.1371/journal.pone.0112066.t001

### Blood glucose concentration test

By using Ascensia Breeze Blood Glucose Monitoring System (Newbury, Berks, UK), the progression of T2D was determined by weekly tested non-fasted blood glucose concentration from week 0 (baseline) to week 5. In an electronic stimulation experiment room, a rat was tenderly put into the plexiglass box linked to the inhalation anesthesia system. Under 2% isoflurane anesthesia, glucose concentration was tested from tail tip blood immediately before taVNS session. The test range was 0.6–33.3 mmol/L. Any concentration over the testing limit was recorded as 33.3 mmol/L for statistical purposes.

### Administration of taVNS

All the time points recorded in this study are in accordance with the taVNS occurrences, i.e. the beginning of taVNS is day 1. For taVNS, under 2% isoflurane inhalation anesthesia, two opposite magnetic electrodes (+/–) were placed over the right side auricular concha region, inside and outside respectively so that electronic current can conduct through the tissue, including the vagus nerve fibers. Saline was applied between an electrode and the skin to improve electronic conduction. A 30 min taVNS procedure at a frequency of 2/15 Hz (2 and 15 Hz, switched every second) and an intensity of 2 mA was administered once daily via an electrical stimulator (HANS-100, Nanjing, China). The parameters had been proven effective previously [17]. The procedures were performed in the afternoon after blood glucose test and blood sample collection at designed time points, for 34 consecutive days for ZDF rats and 27 days for ZL rats. Because the glucose concentration of ZL rats showed no detectable fluctuations for over two weeks, the experimental period in them was one week shorter for the benefit of rats. Auricular margin was used as sham acupoint.

### ELISA

Concentration of plasma HbA1c was evaluated upon sacrifice at day 28 for ZL rats and day 35 for ZDF rats. ELISA kits were purchased from R&D System (Beijing, China) and analyzed by Huanya Biomedicine Technology Co. LTD (Beijing, China). The results were read using a microplate reader (Multiskan MK3, Thermo Scientific, Beijing, China) at wavelengths of 450 nm.

### Forced swimming test (FST)

The FST was modified based on the methods previously used in our study [18,19] but omitted the pre-test session, which we found to be a confounding factor to the final results such that the pre-tested rats tended to stay still in the formal test and the immobility time was extremely prolonged to obscure the difference between animal groups. Briefly, a rat was placed in a clear plastic tank (45×35×60 cm) containing 30 cm of water (24±0.5°C) for 5 min. The total duration of non-swimming time within the 5-min session was recorded with a stopwatch as immobility score (in seconds) and compared among groups. A rat was judged to be non-swimming when no attempt was made to escape the tank and the rat was hunched forward (a floating position). Both ZL and ZDF rats underwent the same test procedure. Following FST session, the rat was removed from the water tank, dried with a towel, and returned to the home cage. All tests took place between 2 PM and 5 PM in a behavior testing room and were observed by the experimenter who blinded to the group assignment in order to minimize between-experimenter and between-session variations.

### Immunohistochemical staining

Rats were anesthetized with sodium pentobarbital and transcardially perfused with 200 ml of saline followed by 200–300 ml of cold 4% paraformaldehyde in 0.1 M phosphate buffer (PB). Brain

**Table 2.** HbA1c concentration on day 35.

| Rat groups                                                   | Naïve ZDF | ZDF-taVNS | Naïve ZL | ZL-taVNS |
|--------------------------------------------------------------|-----------|-----------|----------|----------|
| Mean                                                         | 219.57    | 170.94    | 157.68   | 172.91   |
| Standard deviation (SD)                                      | 27.465    | 17.187    | 23.461   | 35.620   |
| Sample size (N)                                              | 6         | 8         | 7        | 6        |
| Std. error of mean(SEM)                                      | 11.213    | 6.076     | 8.867    | 14.542   |
| Lower 95% conf. limit                                        | 190.74    | 156.57    | 135.98   | 135.53   |
| Upper 95% conf. limit                                        | 248.40    | 185.31    | 179.38   | 210.30   |
| Tukey-Kramer multiple comparisons test P value vs. Naïve ZDF |           | <0.05     | <0.01    | <0.05    |

doi:10.1371/journal.pone.0112066.t002

**Table 3.** Correlations between HbA1c level and immobility time in FST on day 35.

| Rat groups                                 | ZDF                    | ZL                     |
|--------------------------------------------|------------------------|------------------------|
| Estimated HbA1c level from immobility time | $y = 153.244 + 0.685x$ | $y = 173.732 - 0.231x$ |
| Estimated immobility time from HbA1c level | $y = -108.276 + 0.87x$ | $y = 69.655 - 0.186x$  |
| Correlation                                | $R = 0.757$            | $R = -0.207$           |
| P value                                    | $P = 0.002$            | $P = 0.497$            |

doi:10.1371/journal.pone.0112066.t003

sections from bregma  $-1.4$  to  $-4$  [20] were dissected, postfixed for 2 hr, and kept in 30% sucrose in 0.1 M PB until sank to the bottom. Tissues were then mounted in OCT compound and frozen on dry ice.

Brain (30  $\mu\text{m}$ ) sections were cut on a cryostat, mounted serially onto microscope slides, and stored at  $-80^\circ\text{C}$ . Immunohistochemical staining was used to detect IR (mouse monoclonal, 1:1000; Abcam, Cambridge, MA), NeuN (neuronal marker, rabbit monoclonal, 1:1000; Abcam, Cambridge, MA), and GFAP (astrocyte marker, chicken polyclonal, 1:1000; Abcam, Cambridge, MA). Sections were blocked with 1% goat serum in 0.3% Triton for 1 hr at room temperature and incubated overnight at  $4^\circ\text{C}$  with a primary antibody. For controls, a primary antibody was omitted. The sections were then incubated for 1 hr at room temperature with corresponding FITC- or CY3-conjugated secondary antibody (1:200; Jackson ImmunoResearch, West Grove, PA). Four to six nonadjacent brain or spinal sections were randomly selected, analyzed using a LEXT OLS4000 3D Laser Measuring Microscope (Olympus), recorded using a digital camera, and processed using Adobe Photoshop.

### Western blot

The expression of IR in hypothalamus, liver, and skeletal muscle was tested by Western blot. Rats ( $n = 3$  each group) were decapitated under anesthesia and samples were collected. The segments were homogenized in SDS sample buffer containing a mixture of proteinase inhibitors (Sigma). Protein samples were separated on SDS-PAGE gel (4–15% gradient gel; Bio-Rad, Hercules, CA) and transferred to polyvinylidene difluoride filters (Millipore, Bedford, MA). The filters were blocked with 3% milk and incubated overnight at  $4^\circ\text{C}$  with a primary antibody of IR (mouse monoclonal, 1:4000; Abcam, Cambridge, MA) for 1 hr at room temperature with HRP-conjugated secondary antibody (1:7000; Abcam, Cambridge, MA). The blots were visualized in ECL solution (NEN, Boston, MA) for 1 min and exposed onto hyperfilms (Amersham Biosciences) for 1–10 min. The blots were then incubated in a stripping buffer (67.5 mM Tris, pH 6.8, 2% SDS, and 0.7%  $\beta$ -mercaptoethanol) for 30 min at  $50^\circ\text{C}$  and reprobed with a polyclonal rabbit anti-GADPH antibody (1:20,000; Abcam, Cambridge, MA) as loading control. Western analysis was made in triplicates. The density of specific bands was measured with a computer-assisted imaging analysis system and normalized against loading controls. Differences were compared using One-way ANOVA.

### Statistical analysis

By running GraphPad InStat version 3 for Windows, raw data of glucose concentration, immobility, and ELISA results were compared using repeated measure One-way ANOVA to detect differences among treatment groups, followed by Tukey-Kramer Multiple Comparisons Test to determine sources of differences. Data were presented as mean  $\pm$  standard deviation. Differences

were considered to be statistically significant at the level of  $\alpha = 0.05$ . The correlation between HbA1c concentration and immobility time was acquired by linear regression.

## Results

### The development of hyperglycemia in naïve ZDF rats and the preventive effect of taVNS on the progression

As determined by the weekly blood glucose concentration, the naïve ZDF rats ( $n = 6$ ) developed hyperglycemia steadily with age, in contrast with a euglycemia in taVNS treated ZDF rats (Fig. 1a,  $n = 6$ ). The results were also compared with that of ZL rats, naïve, and taVNS or AMS (auricular margin stimulation) treated rats ( $n = 4$ , each), in which no hyperglycemia developed (Fig. 1b).

### Effects of long term taVNS on depression-like behavior and plasma HbA1c concentration in rats

As determined by the FST on day 35, the naïve ZDF rats performed poorly in the tank with an immobility time of  $87.83 \pm 28.03$  (mean  $\pm$  SD,  $n = 6$ ). This immobility time is much longer than that of ZL rats and of taVNS treated ZDF rats (One-way ANOVA  $P = 0.006$ , Fig. 2a, Table 1). Simultaneously, the HbA1c concentration in taVNS treated rats is significantly lower than that in naïve ZDF rats (One-way ANOVA  $P = 0.0019$ , Fig. 2b, Table 2).

The antidepressive and antidiabetic effects of taVNS were also evaluated in ZL rats. While it is antidepressive and antidiabetic in ZDF rats, the taVNS shows no effects in ZL rats, possibly due to normal swimming time and glucose metabolism condition in the latter ( $P > 0.05$ , Fig. 2a, Table 1).

The correlation between the immobility time and the HbA1c concentration on day 35 is shown in Fig. 2c. As analyzed in linear regression, a strong positive correlation exists between the immobility time and the HbA1c concentration in ZDF rats ( $y = 153.244 + 0.685x$ ), in contrast to ZL rats in which a weak negative correlation ( $y = 173.732 - 0.231x$ ) is shown (Fig. 2c, Table 3). Alternatively, a higher HbA1c concentration can predicate a longer immobility time in ZDF rats ( $y = -108.276 + 0.87x$ ), in contrast to that in ZL rats ( $y = 69.655 - 0.186x$ ).

### IR expression in naïve ZDF and the effect of taVNS on the expression of IR

As detected by immunostaining and by Western blots, the expression of IR in the hypothalamus, liver, and skeletal muscle is lower in naïve ZDF rats than that in ZL. However, in the same tissues of the taVNS treated ZDF rats, the IR expression was upregulated (Fig. 3).

In double labelling immunofluorescence brain sections, the IR was colocalized with NeuN (Fig. 4a–d) but not GFAP (Fig. 4e–h), indicating that the IR-immunopositive cells in the brain is

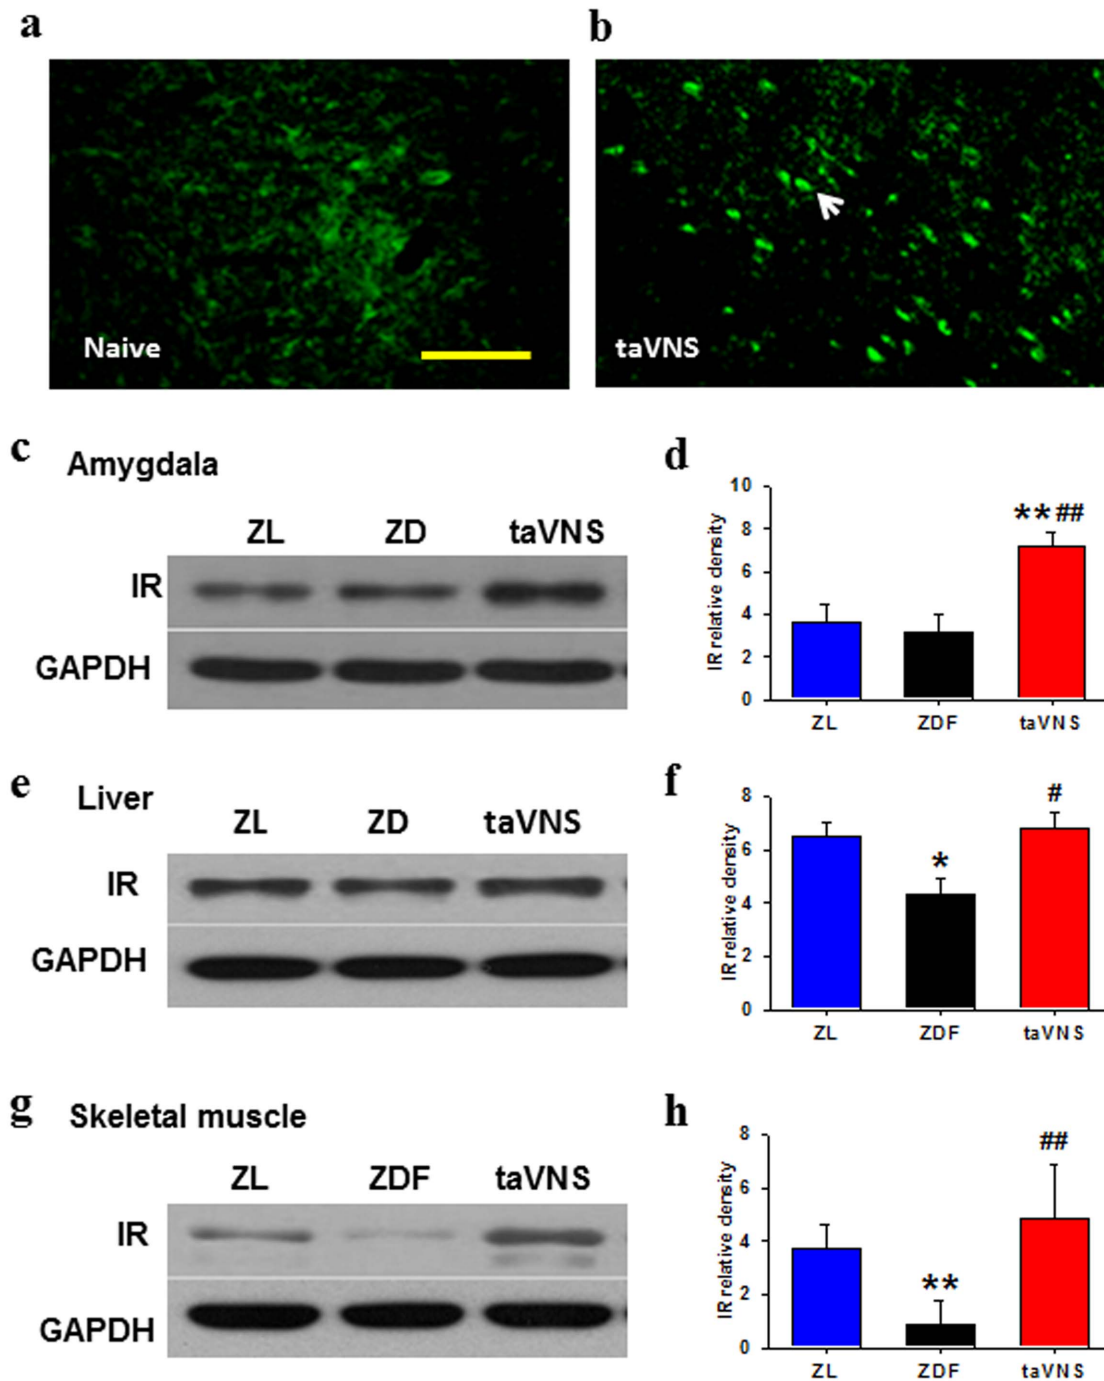

**Figure 3. Expression of insulin receptor in various tissues of rats.** (a, b) Immunofluorescent results showing the expression of insulin receptor (IR) in amygdala of naïve ZDF rats (a) and of ZDF rats treated for 5 consecutive weeks with daily half hour taVNS treatment (b). Arrow head, IR-immunopositive neurons. Bar, 100  $\mu$ m. (c–h) Western blot results showing the expression of insulin receptor in hypothalamus (c, d), liver (e, f), and skeletal muscle (g, h) of naïve rats, or rats treated with taVNS for 34 consecutive days. ZL, naïve ZL rats; ZDF, naïve ZDF rats; taVNS, auricular vagus electronic stimulation.  $n=3$  each group, Western blot triplicated for each sample. \*\*,  $P<0.05$ , 0.01 vs. ZL; ##,  $P<0.05$ , 0.01 vs. ZDF. doi:10.1371/journal.pone.0112066.g003

neuronal in characteristics. The IR expressed in the membrane of neurons.

## Discussion

In this study we report that the ZDF rats not only develop diabetes innately, they also develop depressive-like behaviors and

that taVNS simultaneously prevent the progression of depressive behavior and hyperglycemia in ZDF rats.

A number of epidemiological studies have established a link between insulin resistance and the prevalence of depression. However, at this time it is not conclusive as to whether insulin resistance induces depression or the opposite. Although a study found that downregulation of hypothalamic insulin receptor



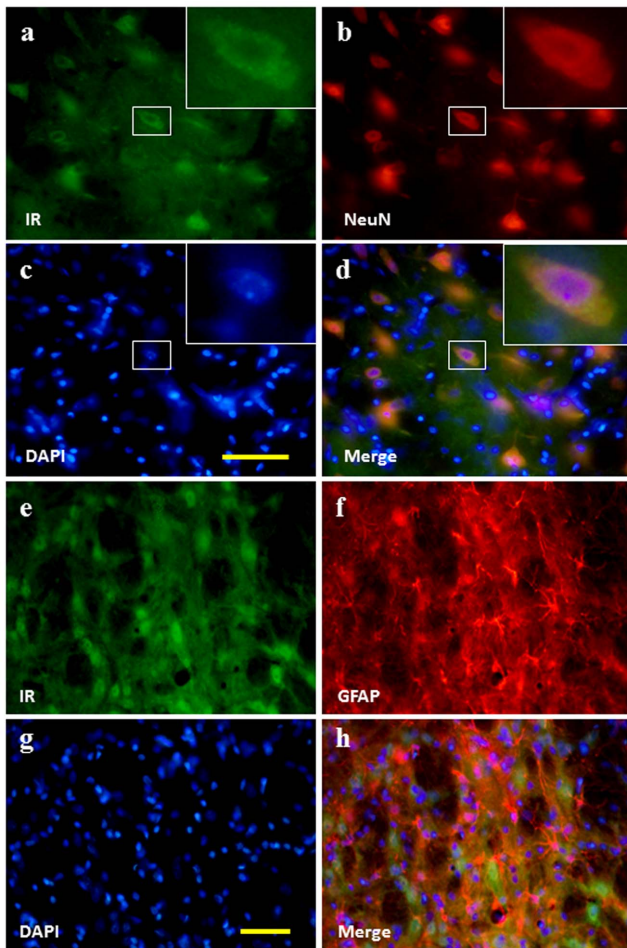

**Figure 4. Neurochemical characteristics of insulin receptor positive cells in the brain.** Double labelling immunofluorescence results showing that the IR is colocalized with NeuN (a–d) but not GFAP (e–h). Bar, 100  $\mu$ m.

doi:10.1371/journal.pone.0112066.g004

expression elicits depressive-like behaviors in rats [21], others found that the occurrence of depression precede the onset of diabetes [22], and that insulin resistance can be reversed by antidepressant treatment [23]. Meanwhile, not only are depressive symptoms a risk factor for the development of T2D, they have also been shown to contribute to hyperglycemia, diabetic complications, functional disability and all-cause mortality among diabetic patients [4,5]. Taken together, these reports indicate that the depression and insulin resistance may be bidirectional in cause.

Leptin is an adipocytokine or hormone secreted by white adipose tissue. Mediated through leptin receptor, leptin works together with insulin to decrease blood glucose level. Genetically, ZDF rats are leptin receptor deficient in and resistant to leptin, and therefore develop T2D with hyperglycemia and hyperinsulinemia. It is reported that hyperinsulinemia increases sympathetic nerve activity in obesity and diabetes [24] and that an increased sympathetic tone is closely related to depression [4]. From this point of view, we propose that depression in ZDF rats might be a result of hyperinsulinemia and glucose metabolism dysfunction in the CNS and that antidepressive effect of taVNS may be elicited

by decreasing sympathetic tone or increasing parasympathetic activity; in turn, this antidepressive effect would also be helpful in reducing the insulin resistance. Indeed, the activity of the vagus nerve is negatively associated with risk factors such as stress and smoking, morbidity and mortality, and accordingly, taVNS which directly stimulates the afferent vagus branches at the auricular concha region, has been used in the therapeutic intervention in depression and epilepsy [23,25,26].

IR is necessary for the insulin to activate the intracellular signaling system both in the CNS and the peripheral cells. It is known that insulin performs unique functions within the CNS [27]. Produced nearly exclusively by the pancreas, insulin crosses the blood-brain barrier using a saturable transporter, affecting feeding and cognition through CNS mechanisms largely independent of glucose utilization. While peripheral insulin acts primarily as a metabolic regulatory hormone, CNS insulin has an array of effects on the brain that may more closely resemble the actions of the ancestral insulin molecule [28,29]. Resistance to insulin action within the CNS may be in parallel or associated with peripheral insulin resistance, but it is also possible that variable insulin resistance syndromes exist so that resistance at one tissue may be independent from that of others. In this study, the expression of IR was low in various tissues including the hypothalamus, the liver, and the skeletal muscle of naïve ZDF rats and it was upregulated in taVNS treated rats. These results, while indicating that IR is involved in the pathogenesis mechanism of depression and T2D, also support the theory that taVNS is helpful in ameliorating both the depressive and the diabetic syndromes in these rats. It is very likely that, the upregulated expression of IR in the peripheral tissue such as liver and skeletal muscle is related to the amelioration of T2D, and in the CNS it is beneficial in the antidepressive effect of taVNS.

Although we demonstrate that taVNS is antidiabetic and antidepressive in ZDF rats, it has limited efficiency in ZL rats, a similar phenomenon as in melatonin treated experimental animals [30]. This may be due to a reduced parasympathetic activity in ZDF but not ZL rats. Further investigation would be focused on detection of the secretion change of hormones that are easily affected by the autonomic nervous system. One such hormone candidate is melatonin, which is related to both depression [19,20,31,32] and T2D [33–35] with nonsufficient concentration in the circulating blood.

## Conclusions

Our results show that downregulated expression of IR and the compensatory hyperinsulinemia may be involved in the comorbidity between depression and T2D and that taVNS has a potential antidiabetic and antidepressive in ZDF rats.

## Acknowledgments

Many thanks to Dr. J. Mao (Massachusetts General Hospital, Harvard Medical School), Dr. B. Zhu (Institute of Acupuncture and Moxibustion, China Academy of Chinese Medical Sciences), Drs. Z.K. Guo, W.C. Yang, and X.H. Cai (Xinxiang Medical Univ.) and members of their laboratories for generous assistance.

## Author Contributions

Conceived and designed the experiments: SW PR. Performed the experiments: SL XZ PR JZ HB XW. Analyzed the data: SW. Contributed reagents/materials/analysis tools: SW. Wrote the paper: SW PR MFM.

## References

- Fu Z, Gilbert ER, Li D (2013) Regulation of insulin synthesis and secretion and pancreatic Beta-cell dysfunction in diabetes. *Curr Diabetes Rev* 9: 25–53.
- Wilding JP (2014) The importance of weight management in type 2 diabetes mellitus. *Int J Clin Pract* 68:682–691.
- Smyth S, Heron A (2006) Diabetes and obesity: the twin epidemics. *Nat Med* 12:75–80.
- Lang UE, Borgwardt S (2013) Molecular mechanisms of depression: perspectives on new treatment strategies. *Cell Physiol Biochem* 31:761–777.
- Rustad JK, Musselman DL, Nemeroff CB (2011) The relationship of depression and diabetes: Pathophysiological and treatment implications. *Psychoneuroendocrinology* 36: 1276–1286.
- Foran E, Hannigan A, Glynn L (2014) Prevalence of depression in patients with type 2 diabetes mellitus in Irish primary care and the impact of depression on the control of diabetes. *Ir J Med Sci*. [Epub ahead of print] PubMed PMID: 24723006.
- Mendenhall E, Norris SA, Shidhaye R, Prabhakaran D (2014) Depression and type 2 diabetes in low- and middle-income countries: a systematic review. *Diabetes Res Clin Pract* 103:276–285.
- Lyons Z, van der Watt G, Shen Z, Janca A (2012) Acupuncture and Chinese herbs as treatments for depression: an Australian pilot study. *Complement Ther Clin Pract* 18:216–220.
- Mischoulon D, Brill CD, Ameral VE, Fava M, Yeung AS (2012) A pilot study of acupuncture monotherapy in patients with major depressive disorder. *J Affect Disord* 141:469–473.
- Yeung AS, Ameral VE, Chuzi SE, Fava M, Mischoulon D (2011) A pilot study of acupuncture augmentation therapy in antidepressant partial and non-responders with major depressive disorder. *J Affect Disord* 130:285–289.
- Zhang ZJ, Chen HY, Yip KC, Ng R, Wong VT (2010) The effectiveness and safety of acupuncture therapy in depressive disorders: systematic review and meta-analysis. *J Affect Disord* 124:9–21.
- Liu RP, Fang JL, Rong PJ, Zhao Y, Meng H, et al. (2013) Effects of electroacupuncture at auricular concha region on the depressive status of unpredictable chronic mild stress rat models. *Evid Based Complement Alternat Med* 2013:789674.
- Peplow PV, Baxter GD (2012) Electroacupuncture for control of blood glucose in diabetes: literature review. *J Acupunct Meridian Stud* 5:1–10.
- Belivani M, Dimitroula C, Katsiki N, Apostolopoulou M, Cummings M, et al. (2013) Acupuncture in the treatment of obesity: a narrative review of the literature. *Acupunct Med* 31: 88–97.
- Wang Q, Li WH, Zhou QH, Tang XD, Zhang XX, et al. (2012) Weight reduction effects of acupuncture for obese women with or without perimenopausal syndrome: a pilot observational study. *Am J Chin Med* 40:1157–1166.
- Preiss K, Brennan L, Clarke D (2013) A systematic review of variables associated with the relationship between obesity and depression. *Obes Rev* 14:906–918.
- Huang F, Dong J, Kong J, Wang H, Meng H (2014) Effect of transcutaneous auricular vagus nerve stimulation on impaired glucose tolerance: a pilot randomized study. *BMC Complement Altern Med* 14:203.
- Wang S, Tian Y, Song L, Lim G, Tan Y, et al. (2012) Exacerbated mechanical hyperalgesia in rats with genetically predisposed depressive behavior: role of melatonin and NMDA receptors. *Pain* 153: 2448–2457.
- Zeng Q, Wang S, Lim G, Yang L, Mao J, et al. (2008) Exacerbated mechanical allodynia in rats with depression-like behavior. *Brain Res* 1200:27–38.
- Paxinos G, Watson C (1997) *The rat brain in stereotaxic coordinates*, 3rd ed. New York: Academic Press.
- Grillo CA, Piroli GG, Kaigler KF, Wilson SP, Wilson MA, et al. (2011) Downregulation of hypothalamic insulin receptor expression elicits depressive-like behaviors in rats. *Behav Brain Res* 222:230–235.
- Cline BH, Steinbusch HW, Malin D, Revishchin AV, Pavlova GV, et al. (2012) The neuronal insulin sensitizer dicholine succinate reduces stress-induced depressive traits and memory deficit: possible role of insulin-like growth factor 2. *BMC Neurosci* 13:110.
- Buhl ES, Jensen TK, Jessen N, Elfving B, Buhl CS, et al. (2010) Treatment with an SSRI antidepressant restores hippocampo-hypothalamic corticosteroid feedback and reverses insulin resistance in low-birth-weight rats. *Am J Physiol Endocrinol Metab* 298:E920–929.
- Ward KR, Bardgett JF, Wolfgang L, Stocker SD (2011) Sympathetic response to insulin is mediated by melanocortin 3/4 receptors in the hypothalamic paraventricular nucleus. *Hypertension* 57:435–441.
- Rong P, Fang J, Kong J, Wang L, Meng H, et al. (2012) Transcutaneous vagus nerve stimulation for the treatment of depression: a study protocol for a double blinded randomized clinical trials. *BMC Complement Altern Med* 12:255.
- He W, Rong PJ, Li L, Ben H, Zhu B, et al. (2012) Auricular acupuncture may suppress epileptic seizures via activating the parasympathetic nervous system: a hypothesis based on innovative methods. *Evid Based Complement Alternat Med* 2012:615476.
- La Marca R, Nedeljkovic M, Yuan L, Maercker A, Elhert U (2010) Effects of auricular electrical stimulation on vagal activity in healthy men: evidence from a three-armed randomized trial. *Clin Sci (Lond)* 118:537–546.
- Zhao WQ, Chen H, Quon MJ, Alkon DL (2004) Insulin and the insulin receptor in experimental models of learning and memory. *Eur J Pharmacol* 490:71–81.
- Banks WA, Owen JB, Erickson MA (2012) Insulin in the brain: there and back again. *Pharmacol Ther* 136:82–93.
- Langenberg C, Pascoe L, Mari A, Tura A, Laakso M, et al. (2009) Common genetic variation in the melatonin receptor 1B gene (MTNR1B) is associated with decreased early-phase insulin response. *Diabetologia* 52:1537–1542.
- Maurizi CP (1984) Disorder of the pineal gland associated with depression, peptic ulcers, and sexual dysfunction. *South Med J* 77:1516–1518.
- Cardinali DP, Srinivasan V, Brzezinski A, Brown GM (2012) Melatonin and its analogs in insomnia and depression. *J Pineal Res* 52:365–375.
- Frese T, Bach AG, Mühlbauer E, Pönicke K, Brömme HJ, et al. (2009) Pineal melatonin synthesis is decreased in type 2 diabetic Goto-Kakizaki rats. *Life Sci* 85:526–533.
- McMullan CJ, Schernhammer ES, Rimm EB, Hu FB, Forman JP (2013) Melatonin secretion and the incidence of type 2 diabetes. *JAMA* 309:1388–1396.
- Agil A, Rosado I, Ruiz R, Figueroa A, Zen N, et al. (2012) Melatonin improves glucose homeostasis in young Zucker diabetic fatty rats. *J Pineal Res* 52:203–210.
